# Supplementary material for: High-resolution electrohydrodynamic jet printing of small-molecule organic light-emitting diodes
Source: Royal Society of Chemistry journal article supplement (doi:10.1039/c5nr03034j), 2015-01-01
Supplement: c5nr03034j1.pdf [file c5nr03034j1.pdf]

## **Supporting Information**

# High-resolution electrohydrodynamic jet printing of small-molecule organic light-emitting diodes

*Kukjoo Kim, Gyeomuk Kim, Bo Ram Lee, Sangyoon Ji, So-Yun Kim, Byeong Wan An,  
Myoung Hoon Song,\* and Jang-Ung Park\**

Dr. K. Kim, G. Kim, S. Ji, S.-Y. Kim, B. W. An, Prof. J.-U. Park

School of Materials Science and Engineering, Wearable Electronics Research Group, Low-Dimensional Carbon Materials Research Center, Ulsan National Institute of Science and Technology (UNIST), Ulsan 689-798, Republic of Korea

E-mail: [jangung@unist.ac.kr](mailto:jangung@unist.ac.kr)

Dr. B. R. Lee, Prof. M. H. Song

School of Materials Science and Engineering, Low-Dimensional Carbon Materials Research Center, Ulsan National Institute of Science and Technology (UNIST), Ulsan 689-798, Republic of Korea

E-mail: [mhsong@unist.ac.kr](mailto:mhsong@unist.ac.kr)

## Methods

*Materials:* ITO glass substrates were purchased from AMG Co. Ltd. and the photoresist for the substrate preparation was purchased from Shipley Co. Ltd. Ortho-dichlorobenzene (Sigma-Aldrich) was used to dilute the TBADN:DPAVBi (Lumtec) ink. PEDOT:PSS (Clevios P VP AI 4083) was used for the hole-injection layer of OLEDs.

*Preparation of structured substrates:* An ITO coated glass (thickness of ITO, 200 nm; average resistance,  $\sim 20 \Omega$ ) was cleaned with a detergent and rinsed with deionized water, acetone, and isopropyl alcohol, sequentially. After drying at 100 °C, an SiO<sub>2</sub> layer was deposited using a sputter. Then, rectangular photoresist arrays with various dimensions were patterned using photolithography and this patterned photoresist was used as an etching mask for reactive ion etching of the SiO<sub>2</sub> layer, followed by photoresist stripping.

*Fabrication of OLEDs:* PEDOT:PSS was filtered, using a hydrophilic filter with 450 nm pores and then spin-coated on the prepared substrate which was preliminarily UV-ozone-treated before spin coating. Then the substrate was baked at 140 °C for 10 min on a hot plate. After the drying of the PEDOT:PSS layer, the emission layer (TBADN:DPAVBi) was printed using e-jet printing technique. These printed OLED pixel patterns were dried at 130 °C for 30 min. Lastly, a 1 nm-thick LiF and a 150 nm-thick Al layers were deposited using a thermal evaporator as an electron-injection layer and a cathode, respectively.

*E-jet printing:* The temperature (20 °C) and relative humidity (10%) were constantly maintained during the printing process. An electrically grounded ITO substrate was positioned on a high-resolution translation stage below the nozzle which was preliminarily coated by a thin metal film to generate an electric field within the stage. Nozzles with internal diameters of 1 or 2  $\mu\text{m}$  were used. The stage translated at a speed of 200  $\mu\text{m}/\text{s}$  during the printing process. The TBADN:DPAVBi ink was supplied by pneumatic pressure (0.2 psi) from the syringe to the nozzle tip. The distance between the nozzle and the substrate was

fixed at 15  $\mu\text{m}$  and the DC voltage was controlled in the range of 220-360 V. The printing frequency was controlled in the range of 1.5-2.5 kHz depending on the applied voltage. Table S2 summarizes the printing conditions for this work.

**Optical microscopic images of devices at each process step.** Figure S1 shows optical microscopic images of devices with pixels of various dimensions at each process step. Pixel sizes are 20  $\mu\text{m}$  x 30  $\mu\text{m}$ , 10  $\mu\text{m}$  x 10  $\mu\text{m}$ , and 10  $\mu\text{m}$  x 30  $\mu\text{m}$ , respectively. Pixels are defined by patterning  $\text{SiO}_2$  layers via conventional photolithography. Poly(3,4-ethylenedioxythiophene)-poly(styrenesulfonate) (PEDOT:PSS) hole-transport layers are spin-coated and 4,4'-bis[4-(di-p-tolylamino)styryl]biphenyl-doped 2-tert-butyl-9,10-di(naphth-2-yl)anthracene (TBADN:DPAVBi (5%)) emitting layers are e-jet printed with precise alignment in ambient environment. Finally, LiF electron-injection layers and Al cathodes are thermally evaporated.

**Optical and electrical characterization of the fabricated OLEDs.** Table S1 summarizes device performances of the e-jet printed TBADN:DPAVBi OLED. Maximum luminance, current efficiency, and external quantum efficiency (EQE) are shown at each corresponding voltage, indicating reasonable operation of the e-jet printed OLED.

Supporting Figures and Tables

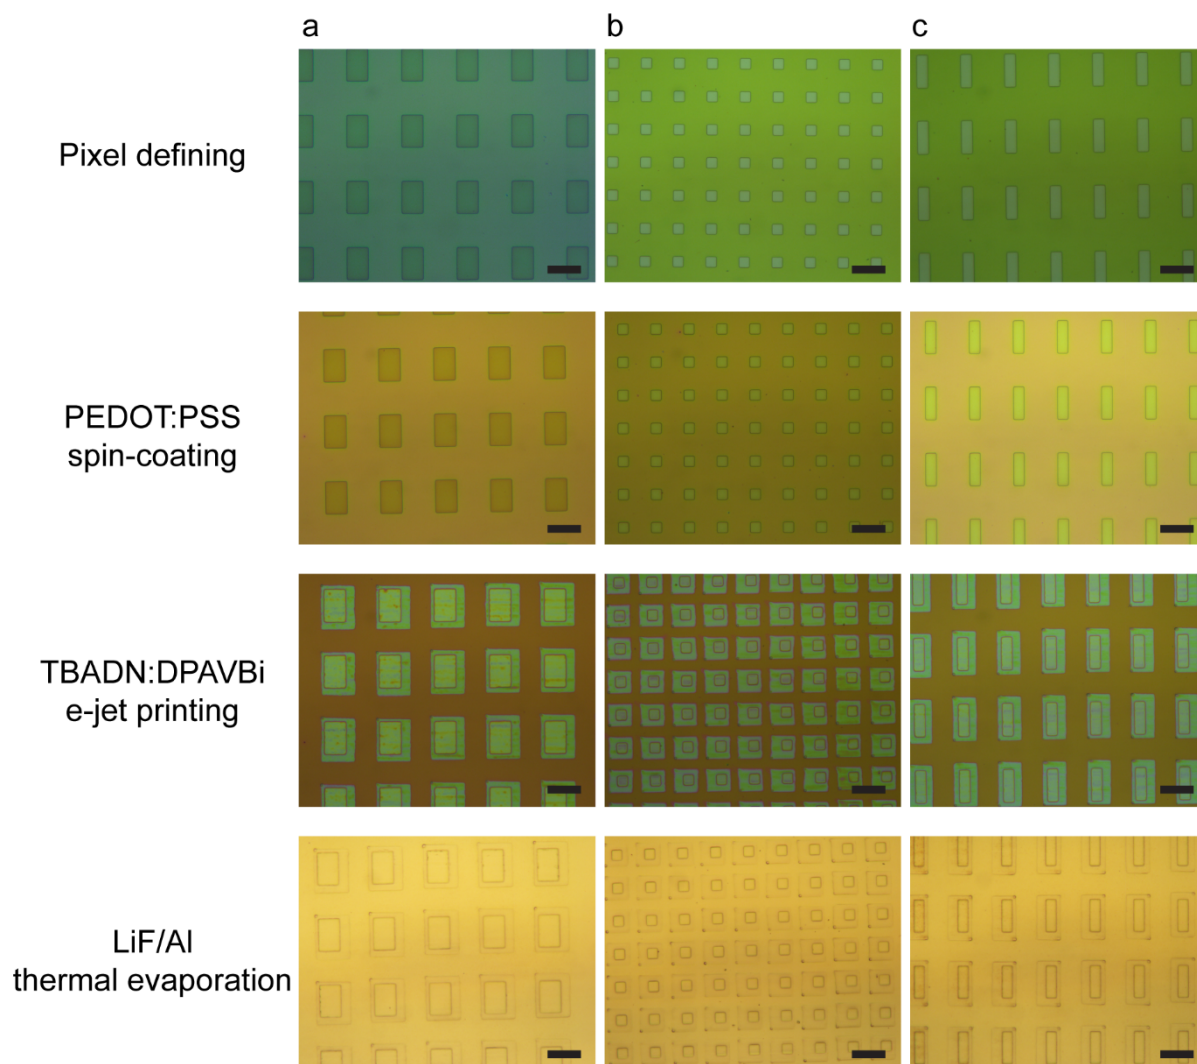

**Figure S1.** Optical microscopic images of devices at each fabrication step (pixel defining, PEDOT:PSS spin-coating, TBADN:DPAVBi e-jet printing, and LiF/Al thermal evaporation). Pixel sizes are (a) 20  $\mu\text{m}$  x 30  $\mu\text{m}$ , (b) 10  $\mu\text{m}$  x 10  $\mu\text{m}$ , and (c) 10  $\mu\text{m}$  x 30  $\mu\text{m}$ , respectively. All scale bars, 30  $\mu\text{m}$ .

**Table S1.** Summarized device performances of the e-jet printed OLED.

|                          | turn-on voltage<br>(V) | maximum luminance<br>(cd/m <sup>2</sup> )<br>(at voltage) | maximum current efficiency<br>(cd/A)<br>(at voltage) | maximum EQE<br>(%)<br>(at voltage) |
|--------------------------|------------------------|-----------------------------------------------------------|------------------------------------------------------|------------------------------------|
| E-jet<br>printed<br>OLED | 4.5                    | 16872.8<br>(20.0 V)                                       | 8.7<br>(17.4 V)                                      | 4.6<br>(16.8 V)                    |

**Table S2.** Summarized printing conditions.

| Dilution               | Nozzle inner diameter | Nozzle-substrate distance | Voltage   | Pneumatic pressure |
|------------------------|-----------------------|---------------------------|-----------|--------------------|
| undiluted-<br>1:20 wt% | 1 or 2 $\mu\text{m}$  | 15 $\mu\text{m}$          | 220-360 V | 0.2 psi            |
